# Supplementary material for: Dual regulation of cytosolic ascorbate peroxidase (APX) by tyrosine nitration and S-nitrosylation
Source: PubMed Central journal article supplement (PMC3904709; doi:10.1093/jxb/ert396), 2013-11-28

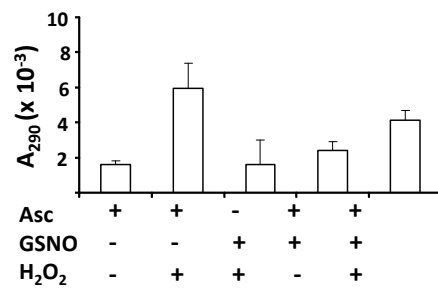

**Supplemental Figure 1.** Interaction effects on  $A_{290}$  of between ascorbate , GSNO and  $H_2O_2$ . Purified APX protein was incubated at different concentrations of SIN-1 at 37°C for 60 min, GSNO at 25°C for 30 min or GSH at 25°C for 30 min. The specific activity of the recombinant APX was 204 nmol ascorbate · min<sup>-1</sup> · mg<sup>-1</sup> protein. Data are means ± SEM of at least three replicates. \*Differences from control values were significant at  $P < 0.05$ .

## Supplemental Figure 2

**Multiple sequence alignments(A) and phylogenetic tree (B) of the amino acid sequence of pea cAPX and other 15 APX sequences found in Peroxibase (<http://peroxibase.toulouse.inra.fr/>) from the three model plants *Arabidopsis thaliana*, *Medicago truncatula* and *Lotus japonicus* with different subcellular localization including cytosol, peroxisome and chloroplast (stroma and thylakoid). Six APXs are from *A. thaliana*, including two cytosolic (AtAPx01, AtAPx02), 2 peroxisomal (AtAPx03, AtAPx04), 1 stromal (AtAPx05), 1 thylakoid-bound (AtAPx06) and 1 thylakoid-lumen that is remarked as not as APX (AtAPx07); seven APXs from *M. truncatula*: 2 cytosolic (MtAPx01, MtAPx03), 2 peroxisomal (MtAPx02, MtAPx05), 2 thylakoid-bound (MtAPx07-1, MtAPx07-2) and 1 un-localized (MtAPx05); and two APXs from *L. japonicus*: peroxisomal (LjAPx02) and cytosolic (LjAPx01). The relative position of Tyr-5, Tyr-235 and Cys-32 of pea cAPX is indicated in the protein sequences by yellow color. Single asterisk indicates identical residues. Semi-colon indicates conservative substitutions. Period indicate less conservative substitutions.**

### (A)

```
MtAPx07-1_thylakoid-bound -----MATITGGAAARMIPSATRATVSLSTSRSFSSFS
MtAPx07-2_thylakoid-bound -----MATITGGAAARMIPSATRATVSLSTSRSFSSFS
AtAPx06_thylakoid-bound -----MSVSLSAASHLLCSSTRVSLSPAVTSSSSSPVV
AtAPx05_stromal MAERVSLTLNGTLLSPPPTTTTTTMSSSLRSTTAASLLLRSSSSSRSTL
LjAPx02_peroxisomal -----
MtAPx02_peroxisomal -----
AtAPx03_peroxisomal -----
MtAPx05_peroxisomal -----
AtAPx04_peroxisomal -----
PsAPX_cytosolic -----
MtAPx01_cytosolic -----
LjAPx01_cytosolic -----
MtAPx03_cytosolic -----
AtAPx01_cytosolic -----
AtAPx02_cytosolic -----
MtAPx04_N/D -----MGVSFLSISTLPSLHPLGGSHYPKTTSTRHQPRSVSICCAKIK

MtAPx07-1_thylakoid-bound LASSRSVSSLNCLRSSPRISHIFLNQRRGEVR-----VSSGRFGTVAF
MtAPx07-2_thylakoid-bound LASSRSVSSLNCLRSSPRISHIFLNQRRGEVR-----VSSGRFGTVAF
AtAPx06_thylakoid-bound ALSSSTSPHSLGVSASSSLFPHSSFVLQKKHPIN----GTSTRMISPKCA
AtAPx05_stromal TLSASSSLSFVRSVLVSSPRLSSSSSLSQKKYRIASVNRFSNSTAATKSS
LjAPx02_peroxisomal -----MALPVVVD
MtAPx02_peroxisomal -----MAFPVVVD
AtAPx03_peroxisomal -----MAAPIVD
MtAPx05_peroxisomal -----MAKYAVD
AtAPx04_peroxisomal -----MAVNVD
PsAPX_cytosolic -----GKSYPTVS
MtAPx01_cytosolic -----MGKSYPTVS
LjAPx01_cytosolic -----MGKSYPTVS
MtAPx03_cytosolic -----M
AtAPx01_cytosolic -----MTKNYPTVS
AtAPx02_cytosolic -----MVKKSYPEVK
MtAPx04_N/D TDVSDEEEQFFHWRRLDVLKCIGLTIGLESISSGSLGTTANAADLIERR

MtAPx07-1_thylakoid-bound ASDPDQLKSAREDIKELLKTKF*CHPLLIRLGWHDAGTYNKNI EEWQRRGG
MtAPx07-2_thylakoid-bound ASDPDQLKSAREDIKELLKTKF*CHPLLIRLGWHDAGTYNKNI EEWQRRGG
AtAPx06_thylakoid-bound ASDAAQLISAKEDIKVLRLTKF*CHPILVRLGWHDAGTYNKNI EEWPLRGG
AtAPx05_stromal SSDPDQLKNAREDIKELLSTKF*CHPILVRLGWHDAGTYNKNI KEWPQRRGG
LjAPx02_peroxisomal GDYLKEVDKARRDLRALIANRNCAPLMLRLAWHDAGTYDA----RKTGTGG
MtAPx02_peroxisomal SEYLKEIEKARRDLRALIANRNCAPLMLRLAWHDAGTYDA----KTKTGG
AtAPx03_peroxisomal AEYLKEITKARRELRLSIANKNCAPIMLRLAWHDAGTYDA----QSKTGG
MtAPx05_peroxisomal AEYVKEIEEVRRDLRSFITNKK*CAPLMLRLAWHDAGTYDA----KTRTGG
AtAPx04_peroxisomal AEYLKEIEKTRDLRALISSRNCAPIMLRLAWHDAGTYDA----KKTGTGG
PsAPX_cytosolic PDYQKAIEKAKRKLGRFIAEKK*CAPLILRLAWHSAGTFDS----KTKTGG
MtAPx01_cytosolic ADYQKAVEKAKRKLGRFIAEKK*CAPLMLRLAWHSAGTFDS----KTKTGG
LjAPx01_cytosolic ADYQKAIEKARRKLGRFIADKK*CAPLMLRLAWHSAGTFDV----KTKTGG
```

MtAPx03\_cytosolic QTQTPALNASRKKLVELIETSRNVWLIFHWKS-----  
AtAPx01\_cytosolic EDYKKAWEKCRKRRLRGLIAEKNCAPIMVRLAWHSAGTFDC----QSRRTGG  
AtAPx02\_cytosolic EYKKAQVQRCKRKLRLGLIAEKHCAPIVLRLAWHSAGTFDV----KTKTGG  
MtAPx04\_N/D QRSDFQSQIKGTLTYAIKANPDLTPSILTLALNDALTYDK----ATKTGG

: .

MtAPx07-1\_thylakoid-bound ANGSLRFEVELKHGANAGLVNALKLLQPIKDKYSGVTYADLFQLASATAV  
MtAPx07-2\_thylakoid-bound ANGSLRFEVELKHGANAGLVNALKLLQPIKDKYSGVTYADLFQLASATAV  
AtAPx06\_thylakoid-bound ANGSLRFEAEELKHAANAGLLNALKLIQPLKDKYPNISYADLFQLASATAI  
AtAPx05\_stromal ANGSLRFDIELKHAANAGLVNALKLLQPIKDKYSGVTYADLFQLASATAI  
LjAPx02\_peroxisomal PNGSIRNEEEFSGHANNGLKKAIDFCEEVKTKVPKITYADLYQLAGVVAV  
MtAPx02\_peroxisomal PNASIRNEEEFSGHANNGLKKAIDFCEEVKAKHPKI SYADLYQLAGVVAV  
AtAPx03\_peroxisomal PNGSIRNEEEHSHGANSGLKIALDLCEGVKAKHPKI SYADLYQLAGVVAV  
MtAPx05\_peroxisomal PNGSIRNQOELNHAANKGLKTAVELCEEVKVKHPKVSADLYQLAGVVAV  
AtAPx04\_peroxisomal ANGSIRFKEELNRPHNKGLEKAVAFCEEVKAKHPRVSYADLYQLAGVVAV  
**PsAPX**\_cytosolic PFGTIKHQAELAHGANGLDIAVRLLEPLKEQFPPI SYADFYQLAGVVAV  
MtAPx01\_cytosolic PFGTIKHQAELAHGANGLDIAVRLLEPLKEQFPPI SYADFYQLAGVVAV  
LjAPx01\_cytosolic PFGTMKHAELAHGANGLDIAVRLLEPLKEQFPPI SYADFYQLAGVVAV  
MtAPx03\_cytosolic -----KVILEPLKEQFLIISYVDFYQLSGVVAV  
AtAPx01\_cytosolic PFGTMRFDAEQAHGANSGLIHALRLLDPIREQFPPI SFADFHQLAGVVAV  
AtAPx02\_cytosolic PFGTIRHPQELAHGANGLDIAVRLLEPLKEQFPPI SYADFYQLAGVVAV  
MtAPx04\_N/D PNGSIRFSSEISRPNKGLSALNFIEEAKKEIDSYSGKGPISYADLIQY

: . : . . . :

MtAPx07-1\_thylakoid-bound EEAGGPKIPMKYGRVDVTGPEQCPEEGRLPDAGPPSPADHLRQVIFY-RMG  
MtAPx07-2\_thylakoid-bound EEAGGPKIPMKYGRVDVTGPEQCPEEGRLPDAGPPSPADHLRQVIFY-RMG  
AtAPx06\_thylakoid-bound EEAGGPDIPMKYGRVDVVAPEQCPEEGRLPDAGPPSPADHLRDVIFY-RMG  
AtAPx05\_stromal EEAGGPKIPMKYGRVDASGPEDCPEEGRLPDAGPPSPATHLREVFIFY-RMG  
LjAPx02\_peroxisomal EITGGPTINFPVGRKDS---KISTNEGRLPDA--KQGVPHLRDIFY-RMG  
MtAPx02\_peroxisomal EVTGGPTVNFVPGRRDS---KVCTRDGRLPDA--KQGVSHLRDIFY-RMG  
AtAPx03\_peroxisomal EVTGGPDIVFVPGRRDS---NVCPEGRRLPDA--KQGFQHLRDVIFY-RMG  
MtAPx05\_peroxisomal EVTGGPTIQFVPGRRDS---LESPQEGRLPDA--KQGASHLREIFY-RMG  
AtAPx04\_peroxisomal EVTGGPAIPFTVGRKDS---ADSADDGELPNP--NEGASHLRTLFS-RMG  
**PsAPX**\_cytosolic EITGGPEVFPFHGREDK---PEPPPEGRRLPDA--TKGSDHLRDVFGKAMG  
MtAPx01\_cytosolic EVTGGPEVFPFHGREDK---PEPPPEGRRLPDA--TKGSDHLRDVFGKAMG  
LjAPx01\_cytosolic EVTGGPDVFPFHGREDK---PQPPPEGRRLPDA--TKGSDHLRDVFKVTMG  
MtAPx03\_cytosolic EITGGPEVFPFHGGEDK---PEPPLEGRRLPDA--TEGSNHLRDVFGKSMG  
AtAPx01\_cytosolic EVTGGPDIPFHPGREDK---PQPPPEGRRLPDA--TKGCDHLRDVFAKQMG  
AtAPx02\_cytosolic EITGGPEIPFHPGRLDK---VEPPPEGRRLPDA--TKGVDHLRDVFG-RMG  
MtAPx04\_N/D AAQSATKAQFLASAIRK---CGGNEEKGNLLYT--AYGSNGQWGLFDRQFG

. . . : . . \* . \* . : \* : \*

MtAPx07-1\_thylakoid-bound LNDKEIVALSGAHTLGRSRPDRSGWGKPKETKYTKDGPAGGGQSWTAQWL  
MtAPx07-2\_thylakoid-bound LNDKEIVALSGAHTLGRSRPDRSGWGKPKETKYTKDGPAGGGQSWTAQWL  
AtAPx06\_thylakoid-bound LDDKEIVALSGAHTLGRARPDRSGWGKPKETKYTKTGPGEAGGGQSWTVKWL  
AtAPx05\_stromal LDDKDIVALSGAHTLGRSRPDRSGWGKPKETKYTKEGPGAPGGQSWTPEWL  
LjAPx02\_peroxisomal LTDKDIVALSGAHTLGRAHPERSGFDFG-----WTEEDPL  
MtAPx02\_peroxisomal LTDKDIVALSGAHTLGRAHPERSGFDFG-----WTEEDPL  
AtAPx03\_peroxisomal LSDKDIVALSGGHTLGRAHPERSGFDFG-----WTQEPL  
MtAPx05\_peroxisomal LTDKDIVALSGGHTLGKAHKDRSNFEGQ-----WTRDPL  
AtAPx04\_peroxisomal LLDRDIVALSGGHTLGRAHKERSDFEGP-----WTQDPL  
**PsAPX**\_cytosolic LSDQDIVALSGGHTIGAAHKERSGFEGP-----WTSNPL  
MtAPx01\_cytosolic LSDQDIVALSGGHTIGAAHKERSGFEGP-----WTSNPL  
LjAPx01\_cytosolic LNDVDIVALSGGHTLGAHKERSGFEGP-----WTTNPH  
MtAPx03\_cytosolic LSDQDIVALSGXHTIGAAHKERSGFEGP-----WTSNPL  
AtAPx01\_cytosolic LSDKDIVALSGAHTLGRCHKDRSGFEGA-----WTSNPL  
AtAPx02\_cytosolic LNDKDIVALSGGHTLGRCHKERSGFEGA-----WTPNPL  
MtAPx04\_N/D RTDTDEADPEGRIPLWEKASVQEMKDKFS-----AVGFG

\* : . \* . : . :

MtAPx07-1\_thylakoid-bound KFDNSYFKDIKEKKDEDLLVLPDAAALFDDPSFKVYAEKYAVDQEAFFKD  
MtAPx07-2\_thylakoid-bound KFDNSYFKDIKEKKDEDLLVLPDAAALFDDPSFKVYAEKYAVDQEAFFKD  
AtAPx06\_thylakoid-bound KFDNSYFKDIKEKRDDLLVLPDAAALFDDPSFKVYAEKYAEDVAAFFKD  
AtAPx05\_stromal KFDNSYFKEIKEKRDEDLLVLPDAAALFDDPSFKVYAEKYAADQDAFFKD  
LjAPx02\_peroxisomal KFDNSYFVELLKEESAGLLKLPDALKALLEDPAFRRYVELYAKDEEAFFRD  
MtAPx02\_peroxisomal KFDNSYFQILLEEDSAAALLKLPDTRALLDDPEFRRYVELYAKDEDAFFRD  
AtAPx03\_peroxisomal KFDNSYFVELLKGESGLLKLPDCKLLEDPEFRRLVELYAKDEDAFFRD  
MtAPx05\_peroxisomal KFDNSYFVELLMKLESNDLLKLPDALKALLEDPAFRRYVELYAKDENAFFRD  
AtAPx04\_peroxisomal KFDNSYFVELLKGEPGLLQKLPDALKALLEDPKFHPFVKLYAKDEDMFFKA  
**PsAPX**\_cytosolic IFDNSYFTELLTGKEDGLLQLPDALKALLEDVFRPLVEKYAAEDVFFAD  
MtAPx01\_cytosolic IFDNSYFTELLGGEKEGLLQLPDALKALLEDVFRPLVEKYAAEDDAFFAD

LjAPx01\_cytosolic IFDNTYFTELLTGEKEGLLQLPTDKALLSDPVFRPLVDKYAADEDAFFAD  
 MtAPx03\_cytosolic IFDNSYFTKLLGGEKEGLLQLPSDKALLSDLVFRLLVEKYVADEDAFFAD  
 AtAPx01\_cytosolic IFDNSYFKELLSGEKEGLLQLVSDKALLDDPVFRPLVEKYAADEDAFFAD  
 AtAPx02\_cytosolic IFDNSYFKEILSGEKEGLLQLPTDKALLDDPLFLPFVEKYAADEDAFFED  
 MtAPx04\_N/D PRQLAVLSAFIGPDQDATETLLASDPDVAPWVQKYQRSRETVSRTDYEVD  
 : : : : \* : . . . . . :

MtAPx07-1\_thylakoid-bound YAEAHAKLSNLGAKFEPAGVVDGSPNVVGEKFVAAKYSSGK-----  
 MtAPx07-2\_thylakoid-bound YAEAHAKLSNLGAKFEPAGVVDGSPNVVGEKFVAAKYSSGKELSDAM  
 AtAPx06\_thylakoid-bound YAEAHAKLSNLGAKFDPPGIVIEEN----VPEKFVAAKYSTGKKELSDSM  
 AtAPx05\_stromal YAVAHAKLSNLGAEFNPPEGIVI-----  
 LjAPx02\_peroxisomal YAESHKKLSELGFVFP-SSKASSPKDGTILLQSAVGVVVVTGAVVILSYLYE  
 MtAPx02\_peroxisomal YAESHKKLSELGFAP-SSKATAPVDATVLAQSAFGVAAAAVVILGYLYE  
 AtAPx03\_peroxisomal YAESHKKLSELGFNPSSAGKAVADSTILAQSAFGVAVAAA VVAFGYFYE  
 MtAPx05\_peroxisomal YATSHKKLSELGFNP-----SCSYRSQLAKAALGMVIASTVVVLGYLLE  
 AtAPx04\_peroxisomal YAI SHKKLSELGFNP-----PRRIPSAVTQQTGLGIAVAAA VVIF TICYE  
 PsAPX\_cytosolic YAEAHLKSELGFAEA-----  
 MtAPx01\_cytosolic YAEAHQKSELGFAEA-----  
 LjAPx01\_cytosolic YAESHKRLSELGFADA-----  
 MtAPx03\_cytosolic YVEARQKLFELGFAEA-----  
 AtAPx01\_cytosolic YAEAHMKLSELGFADA-----  
 AtAPx02\_cytosolic YTEAHLKSELGFADKE-----  
 MtAPx04\_N/D LITTFTKLSTLGQKINYEAYTYPRKKIDITKLL-----  
 : \*\* \*\*

MtAPx07-1\_thylakoid-bound -----  
 MtAPx07-2\_thylakoid-bound RKKIRAEYEAVGGSPDKALKSNYFLNIIIVIAALAILTYLFGN-----  
 AtAPx06\_thylakoid-bound KKKIRAEYEAIIGGSPDKPLPTNYFLNIIAIGVLVLLSTLFGGNNNSDFS  
 AtAPx05\_stromal -----  
 LjAPx02\_peroxisomal IRKRAK-----  
 MtAPx02\_peroxisomal THKRGK-----  
 AtAPx03\_peroxisomal IRKRMK-----  
 MtAPx05\_peroxisomal LNKKIN-----  
 AtAPx04\_peroxisomal ASRRGK-----  
 PsAPX\_cytosolic -----  
 MtAPx01\_cytosolic -----  
 LjAPx01\_cytosolic -----  
 MtAPx03\_cytosolic -----  
 AtAPx01\_cytosolic -----  
 AtAPx02\_cytosolic -----  
 MtAPx04\_N/D -----

MtAPx07-1\_thylakoid-bound --  
 MtAPx07-2\_thylakoid-bound --  
 AtAPx06\_thylakoid-bound GF  
 AtAPx05\_stromal --  
 LjAPx02\_peroxisomal --  
 MtAPx02\_peroxisomal --  
 AtAPx03\_peroxisomal --  
 MtAPx05\_peroxisomal --  
 AtAPx04\_peroxisomal --  
 PsAPX\_cytosolic --  
 MtAPx01\_cytosolic --  
 LjAPx01\_cytosolic --  
 MtAPx03\_cytosolic --  
 AtAPx01\_cytosolic --  
 AtAPx02\_cytosolic --  
 MtAPx04\_N/D --

(B)

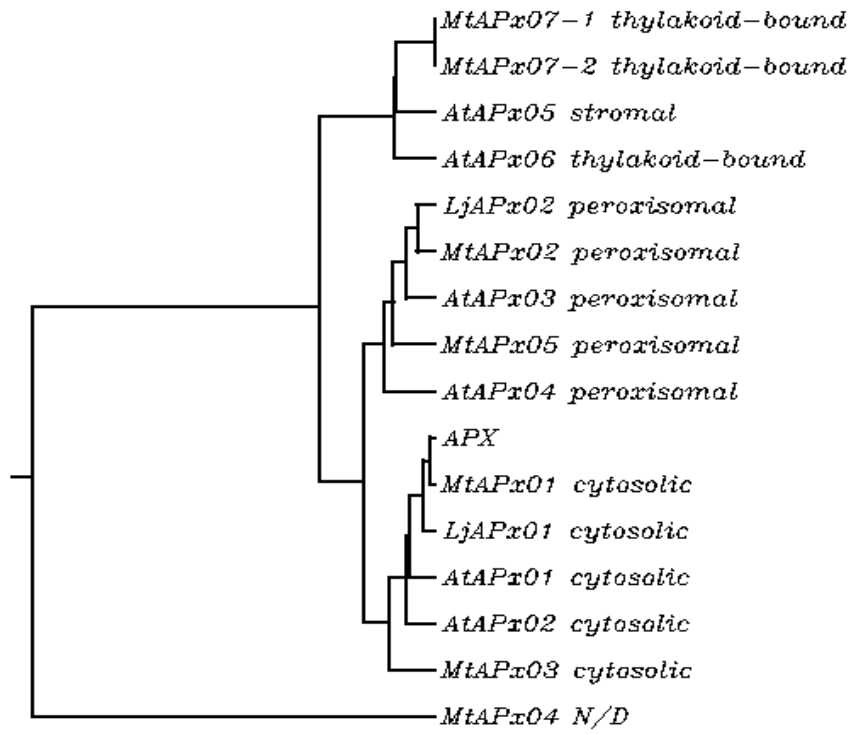

Supplement: supp_ert396_jexbot106138_file001.pdf [file supp_ert396_jexbot106138_file001.pdf]
